# Supplementary material for: Main Determinants Affecting the Antiproliferative Activity of Stilbenes and Their Gut Microbiota Metabolites in Colon Cancer Cells: A Structure–Activity Relationship Study
Source: MDPI journal article supplement (doi:10.3390/ijms232315102), 2022-12-01
Supplement: s1 [file s1]

## Supporting Information

### **Main Determinants Affecting the Antiproliferative Activity of Stilbenes and Their Gut Microbiota Metabolites in Colon Cancer Cells: A Structure–Activity Relationship Study**

Antonio González-Sarrias <sup>1</sup>, Juan Carlos Espín-Aguilar <sup>1</sup>, Salvador Romero-Reyes <sup>1</sup>, Julio Puigcerver <sup>2</sup>, Mateo Alajarín <sup>2</sup>, José Berná <sup>2</sup>, María Victoria Selma <sup>1</sup> and Juan Carlos Espín <sup>1,\*</sup>

<sup>1</sup> Laboratory of Food and Health, Research Group on Quality, Safety, and Bioactivity of Plant Foods, Department of Food Science and Technology, CEBAS-CSIC, Campus de Espinardo, P.O. Box 164, 30100 Murcia, Spain

<sup>2</sup> Department of Organic Chemistry, Faculty of Chemistry, University of Murcia, 30100 Murcia, Spain

\* Correspondence: [jcespin@cebas.csic.es](mailto:jcespin@cebas.csic.es)

**Table S1.** Multiple comparisons of stilbene and dibenzyl IC<sub>50</sub> values.

**Caco-2 cells at 72 h (ANOVA on ranks followed by the Student-Newman-Keuls test).**

| Comparison               | Diff of Ranks | q     | P      | Statistical significance |
|--------------------------|---------------|-------|--------|--------------------------|
| DHP <i>vs.</i> 4HST      | 173.000       | 5.708 | 0.002  | Yes                      |
| DHP <i>vs.</i> RSV       | 159.000       | 5.679 | 0.002  | Yes                      |
| DHP <i>vs.</i> DHST      | 146.000       | 5.683 | 0.002  | Yes                      |
| DHP <i>vs.</i> PINO      | 132.000       | 5.646 | 0.002  | Yes                      |
| DHP <i>vs.</i> DHRSV     | 114.000       | 5.410 | 0.004  | Yes                      |
| DHP <i>vs.</i> PICE      | 85.000        | 4.531 | 0.030  | Yes                      |
| DHP <i>vs.</i> 3HDB      | 85.000        | 5.167 | 0.005  | Yes                      |
| DHP <i>vs.</i> PTERO     | 79.000        | 5.586 | 0.001  | Yes                      |
| DHP <i>vs.</i> LUNU      | 62.000        | 5.240 | 0.002  | Yes                      |
| DHP <i>vs.</i> 4STMe     | 33.000        | 3.466 | 0.068  | No                       |
| DHP <i>vs.</i> 4HDB      | 32.000        | 4.438 | 0.005  | Yes                      |
| DHP <i>vs.</i> Oxy-RSV   | 31.000        | 6.328 | <0.001 | Yes                      |
| Oxy-RSV <i>vs.</i> 4HST  | 142.000       | 5.071 | 0.016  | Yes                      |
| Oxy-RSV <i>vs.</i> RSV   | 128.000       | 4.982 | 0.017  | Yes                      |
| Oxy-RSV <i>vs.</i> DHST  | 115.000       | 4.919 | 0.017  | Yes                      |
| Oxy-RSV <i>vs.</i> PINO  | 101.000       | 4.793 | 0.020  | Yes                      |
| Oxy-RSV <i>vs.</i> DHRSV | 83.000        | 4.424 | 0.037  | Yes                      |
| Oxy-RSV <i>vs.</i> PICE  | 54.000        | 3.282 | 0.234  | No                       |
| Oxy-RSV <i>vs.</i> 3HDB  | 54.000        | 3.818 | 0.075  | No                       |
| Oxy-RSV <i>vs.</i> PTERO | 48.000        | 4.057 | 0.034  | Yes                      |
| Oxy-RSV <i>vs.</i> LUNU  | 31.000        | 3.256 | 0.098  | No                       |
| Oxy-RSV <i>vs.</i> 4STMe | 2.000         | 0.277 | 0.979  | No                       |
| Oxy-RSV <i>vs.</i> 4HDB  | 1.000         | 0.204 | 0.885  | No                       |
| 4HDB <i>vs.</i> 4HST     | 141.000       | 5.488 | 0.004  | Yes                      |
| 4HDB <i>vs.</i> RSV      | 127.000       | 5.432 | 0.004  | Yes                      |
| 4HDB <i>vs.</i> DHST     | 114.000       | 5.410 | 0.004  | Yes                      |
| 4HDB <i>vs.</i> PINO     | 100.000       | 5.330 | 0.004  | Yes                      |
| 4HDB <i>vs.</i> DHRSV    | 82.000        | 4.984 | 0.008  | Yes                      |
| 4HDB <i>vs.</i> PICE     | 53.000        | 3.748 | 0.086  | No                       |
| 4HDB <i>vs.</i> 3HDB     | 53.000        | 4.479 | 0.013  | Yes                      |
| 4HDB <i>vs.</i> PTERO    | 47.000        | 4.936 | 0.003  | Yes                      |
| 4HDB <i>vs.</i> LUNU     | 30.000        | 4.160 | 0.009  | Yes                      |
| 4HDB <i>vs.</i> 4STMe    | 1.000         | 0.204 | 0.885  | No                       |
| 4STMe <i>vs.</i> 4HST    | 140.000       | 5.988 | <0.001 | Yes                      |
| 4STMe <i>vs.</i> RSV     | 126.000       | 5.980 | <0.001 | Yes                      |
| 4STMe <i>vs.</i> DHST    | 113.000       | 6.023 | <0.001 | Yes                      |
| 4STMe <i>vs.</i> PINO    | 99.000        | 6.018 | <0.001 | Yes                      |
| 4STMe <i>vs.</i> DHRSV   | 81.000        | 5.728 | <0.001 | Yes                      |
| 4STMe <i>vs.</i> PICE    | 52.000        | 4.395 | 0.016  | Yes                      |
| 4STMe <i>vs.</i> 3HDB    | 52.000        | 5.461 | <0.001 | Yes                      |
| 4STMe <i>vs.</i> PTERO   | 46.000        | 6.379 | <0.001 | Yes                      |

|                        |         |       |        |     |
|------------------------|---------|-------|--------|-----|
| 4STMe <i>vs.</i> LUNU  | 29.000  | 5.920 | <0.001 | Yes |
| LUNU <i>vs.</i> 4HST   | 111.000 | 5.268 | 0.006  | Yes |
| LUNU <i>vs.</i> RSV    | 97.000  | 5.170 | 0.006  | Yes |
| LUNU <i>vs.</i> DHST   | 84.000  | 5.106 | 0.006  | Yes |
| LUNU <i>vs.</i> PINO   | 70.000  | 4.950 | 0.006  | Yes |
| LUNU <i>vs.</i> DHRSV  | 52.000  | 4.395 | 0.016  | Yes |
| LUNU <i>vs.</i> PICE   | 23.000  | 2.415 | 0.319  | No  |
| LUNU <i>vs.</i> 3HDB   | 23.000  | 3.190 | 0.062  | No  |
| LUNU <i>vs.</i> PTERO  | 17.000  | 3.470 | 0.014  | Yes |
| PTERO <i>vs.</i> 4HST  | 94.000  | 5.010 | 0.009  | Yes |
| PTERO <i>vs.</i> RSV   | 80.000  | 4.863 | 0.011  | Yes |
| PTERO <i>vs.</i> DHST  | 67.000  | 4.738 | 0.011  | Yes |
| PTERO <i>vs.</i> PINO  | 53.000  | 4.479 | 0.013  | Yes |
| PTERO <i>vs.</i> DHRSV | 35.000  | 3.676 | 0.046  | Yes |
| PTERO <i>vs.</i> PICE  | 6.000   | 0.832 | 0.826  | No  |
| PTERO <i>vs.</i> 3HDB  | 6.000   | 1.225 | 0.386  | No  |
| 3HDB <i>vs.</i> 4HST   | 88.000  | 5.349 | 0.003  | Yes |
| 3HDB <i>vs.</i> RSV    | 74.000  | 5.233 | 0.003  | Yes |
| 3HDB <i>vs.</i> DHST   | 61.000  | 5.155 | 0.003  | Yes |
| 3HDB <i>vs.</i> PINO   | 47.000  | 4.936 | 0.003  | Yes |
| 3HDB <i>vs.</i> DHRSV  | 29.000  | 4.022 | 0.012  | Yes |
| 3HDB <i>vs.</i> PICE   | 0.000   | 0.000 | 1.000  | No  |
| PICE <i>vs.</i> 4HST   | 88.000  | 6.223 | <0.001 | Yes |
| PICE <i>vs.</i> RSV    | 74.000  | 6.254 | <0.001 | Yes |
| PICE <i>vs.</i> DHST   | 61.000  | 6.406 | <0.001 | Yes |
| PICE <i>vs.</i> PINO   | 47.000  | 6.518 | <0.001 | Yes |
| PICE <i>vs.</i> DHRSV  | 29.000  | 5.920 | <0.001 | Yes |
| DHRSV <i>vs.</i> 4HST  | 59.000  | 4.986 | 0.004  | Yes |
| DHRSV <i>vs.</i> RSV   | 45.000  | 4.726 | 0.005  | Yes |
| DHRSV <i>vs.</i> DHST  | 32.000  | 4.438 | 0.005  | Yes |
| DHRSV <i>vs.</i> PINO  | 18.000  | 3.674 | 0.009  | Yes |
| PINO <i>vs.</i> 4HST   | 41.000  | 4.306 | 0.012  | Yes |
| PINO <i>vs.</i> RSV    | 27.000  | 3.744 | 0.022  | Yes |
| PINO <i>vs.</i> DHST   | 14.000  | 2.858 | 0.043  | Yes |
| DHST <i>vs.</i> 4HST   | 27.000  | 3.744 | 0.022  | Yes |
| DHST <i>vs.</i> RSV    | 13.000  | 2.654 | 0.061  | No  |
| RSV <i>vs.</i> 4HST    | 14.000  | 2.858 | 0.043  | Yes |

**HT-29 cells at 72 h (one-way ANOVA followed by the Student-Newman-Keuls test).**

| Comparison            | Diff of Means | p  | q      | P      | Statistical significance |
|-----------------------|---------------|----|--------|--------|--------------------------|
| 4HDB <i>vs.</i> 4HST  | 72.352        | 13 | 12.970 | <0.001 | Yes                      |
| 4HDB <i>vs.</i> PTERO | 58.836        | 12 | 10.547 | <0.001 | Yes                      |
| 4HDB <i>vs.</i> PINO  | 58.578        | 11 | 10.501 | <0.001 | Yes                      |
| 4HDB <i>vs.</i> DHST  | 48.380        | 10 | 8.673  | <0.001 | Yes                      |
| 4HDB <i>vs.</i> LUNU  | 43.473        | 9  | 7.793  | <0.001 | Yes                      |
| 4HDB <i>vs.</i> 4STMe | 39.593        | 8  | 7.098  | <0.001 | Yes                      |
| 4HDB <i>vs.</i> RSV   | 37.573        | 7  | 6.735  | <0.001 | Yes                      |

|                          |        |    |        |        |     |
|--------------------------|--------|----|--------|--------|-----|
| 4HDB <i>vs.</i> DHRSV    | 27.736 | 6  | 4.972  | 0.013  | Yes |
| 4HDB <i>vs.</i> PICE     | 27.231 | 5  | 4.882  | 0.011  | Yes |
| 4HDB <i>vs.</i> 3HDB     | 14.997 | 4  | 2.688  | 0.244  | No  |
| 4HDB <i>vs.</i> DHP      | 14.314 | 3  | 2.566  | 0.178  | No  |
| 4HDB <i>vs.</i> Oxy-RSV  | 13.331 | 2  | 2.390  | 0.099  | No  |
| Oxy-RSV <i>vs.</i> 4HST  | 59.022 | 12 | 10.581 | <0.001 | Yes |
| Oxy-RSV <i>vs.</i> PTERO | 45.506 | 11 | 8.158  | <0.001 | Yes |
| Oxy-RSV <i>vs.</i> PINO  | 45.247 | 10 | 8.111  | <0.001 | Yes |
| Oxy-RSV <i>vs.</i> DHST  | 35.049 | 9  | 6.283  | 0.002  | Yes |
| Oxy-RSV <i>vs.</i> LUNU  | 30.143 | 8  | 5.404  | 0.010  | Yes |
| Oxy-RSV <i>vs.</i> 4STMe | 26.262 | 7  | 4.708  | 0.029  | Yes |
| Oxy-RSV <i>vs.</i> RSV   | 24.242 | 6  | 4.346  | 0.042  | Yes |
| Oxy-RSV <i>vs.</i> DHRSV | 14.405 | 5  | 2.582  | 0.374  | No  |
| Oxy-RSV <i>vs.</i> PICE  | 13.901 | 4  | 2.492  | 0.307  | No  |
| Oxy-RSV <i>vs.</i> 3HDB  | 1.667  | 3  | 0.299  | 0.976  | No  |
| Oxy-RSV <i>vs.</i> DHP   | 0.984  | 2  | 0.176  | 0.902  | No  |
| DHP <i>vs.</i> 4HST      | 58.038 | 11 | 10.404 | <0.001 | Yes |
| DHP <i>vs.</i> PTERO     | 44.522 | 10 | 7.981  | <0.001 | Yes |
| DHP <i>vs.</i> PINO      | 44.264 | 9  | 7.935  | <0.001 | Yes |
| DHP <i>vs.</i> DHST      | 34.066 | 8  | 6.107  | 0.003  | Yes |
| DHP <i>vs.</i> LUNU      | 29.159 | 7  | 5.227  | 0.011  | Yes |
| DHP <i>vs.</i> 4STMe     | 25.279 | 6  | 4.532  | 0.030  | Yes |
| DHP <i>vs.</i> RSV       | 23.259 | 5  | 4.169  | 0.041  | Yes |
| DHP <i>vs.</i> DHRSV     | 13.421 | 4  | 2.406  | 0.337  | No  |
| DHP <i>vs.</i> PICE      | 12.917 | 3  | 2.316  | 0.242  | No  |
| DHP <i>vs.</i> 3HDB      | 0.683  | 2  | 0.122  | 0.932  | No  |
| 3HDB <i>vs.</i> 4HST     | 57.355 | 10 | 10.282 | <0.001 | Yes |
| 3HDB <i>vs.</i> PTERO    | 43.839 | 9  | 7.859  | <0.001 | Yes |
| 3HDB <i>vs.</i> PINO     | 43.581 | 8  | 7.812  | <0.001 | Yes |
| 3HDB <i>vs.</i> DHST     | 33.383 | 7  | 5.984  | 0.003  | Yes |
| 3HDB <i>vs.</i> LUNU     | 28.476 | 6  | 5.105  | 0.011  | Yes |
| 3HDB <i>vs.</i> 4STMe    | 24.596 | 5  | 4.409  | 0.027  | Yes |
| 3HDB <i>vs.</i> RSV      | 22.575 | 4  | 4.047  | 0.033  | Yes |
| 3HDB <i>vs.</i> DHRSV    | 12.738 | 3  | 2.284  | 0.252  | No  |
| 3HDB <i>vs.</i> PICE     | 12.234 | 2  | 2.193  | 0.129  | No  |
| PICE <i>vs.</i> 4HST     | 45.121 | 9  | 8.089  | <0.001 | Yes |
| PICE <i>vs.</i> PTERO    | 31.605 | 8  | 5.666  | 0.006  | Yes |
| PICE <i>vs.</i> PINO     | 31.347 | 7  | 5.619  | 0.005  | Yes |
| PICE <i>vs.</i> DHST     | 21.149 | 6  | 3.791  | 0.102  | No  |
| PICE <i>vs.</i> LUNU     | 16.242 | 5  | 2.912  | 0.258  | No  |
| PICE <i>vs.</i> 4STMe    | 12.362 | 4  | 2.216  | 0.409  | No  |
| PICE <i>vs.</i> RSV      | 10.341 | 3  | 1.854  | 0.398  | No  |
| PICE <i>vs.</i> DHRSV    | 0.504  | 2  | 0.0904 | 0.949  | No  |
| DHRSV <i>vs.</i> 4HST    | 44.617 | 8  | 7.998  | <0.001 | Yes |
| DHRSV <i>vs.</i> PTERO   | 31.101 | 7  | 5.575  | 0.006  | Yes |
| DHRSV <i>vs.</i> PINO    | 30.842 | 6  | 5.529  | 0.005  | Yes |
| DHRSV <i>vs.</i> DHST    | 20.644 | 5  | 3.701  | 0.087  | No  |
| DHRSV <i>vs.</i> LUNU    | 15.738 | 4  | 2.821  | 0.207  | No  |

|                        |        |   |        |       |     |
|------------------------|--------|---|--------|-------|-----|
| DHRSV <i>vs.</i> 4STMe | 11.857 | 3 | 2.126  | 0.301 | No  |
| DHRSV <i>vs.</i> RSV   | 9.837  | 2 | 1.763  | 0.220 | No  |
| RSV <i>vs.</i> 4HST    | 34.779 | 7 | 6.235  | 0.002 | Yes |
| RSV <i>vs.</i> PTERO   | 21.264 | 6 | 3.812  | 0.099 | No  |
| RSV <i>vs.</i> PINO    | 21.005 | 5 | 3.766  | 0.079 | No  |
| RSV <i>vs.</i> DHST    | 10.807 | 4 | 1.937  | 0.525 | No  |
| RSV <i>vs.</i> LUNU    | 5.901  | 3 | 1.058  | 0.737 | No  |
| RSV <i>vs.</i> 4STMe   | 2.020  | 2 | 0.362  | 0.799 | No  |
| 4STMe <i>vs.</i> 4HST  | 32.759 | 6 | 5.873  | 0.002 | Yes |
| 4STMe <i>vs.</i> PTERO | 19.243 | 5 | 3.450  | 0.126 | No  |
| 4STMe <i>vs.</i> PINO  | 18.985 | 4 | 3.403  | 0.093 | No  |
| 4STMe <i>vs.</i> DHST  | 8.787  | 3 | 1.575  | 0.512 | No  |
| 4STMe <i>vs.</i> LUNU  | 3.880  | 2 | 0.696  | 0.626 | No  |
| LUNU <i>vs.</i> 4HST   | 28.879 | 5 | 5.177  | 0.006 | Yes |
| LUNU <i>vs.</i> PTERO  | 15.363 | 4 | 2.754  | 0.226 | No  |
| LUNU <i>vs.</i> PINO   | 15.105 | 3 | 2.708  | 0.148 | No  |
| LUNU <i>vs.</i> DHST   | 4.907  | 2 | 0.880  | 0.538 | No  |
| DHST <i>vs.</i> 4HST   | 23.972 | 4 | 4.297  | 0.021 | Yes |
| DHST <i>vs.</i> PTERO  | 10.456 | 3 | 1.874  | 0.390 | No  |
| DHST <i>vs.</i> PINO   | 10.198 | 2 | 1.828  | 0.204 | No  |
| PINO <i>vs.</i> 4HST   | 13.774 | 3 | 2.469  | 0.201 | No  |
| PINO <i>vs.</i> PTERO  | 0.258  | 2 | 0.0463 | 0.974 | No  |
| PTERO <i>vs.</i> 4HST  | 13.516 | 2 | 2.423  | 0.095 | No  |

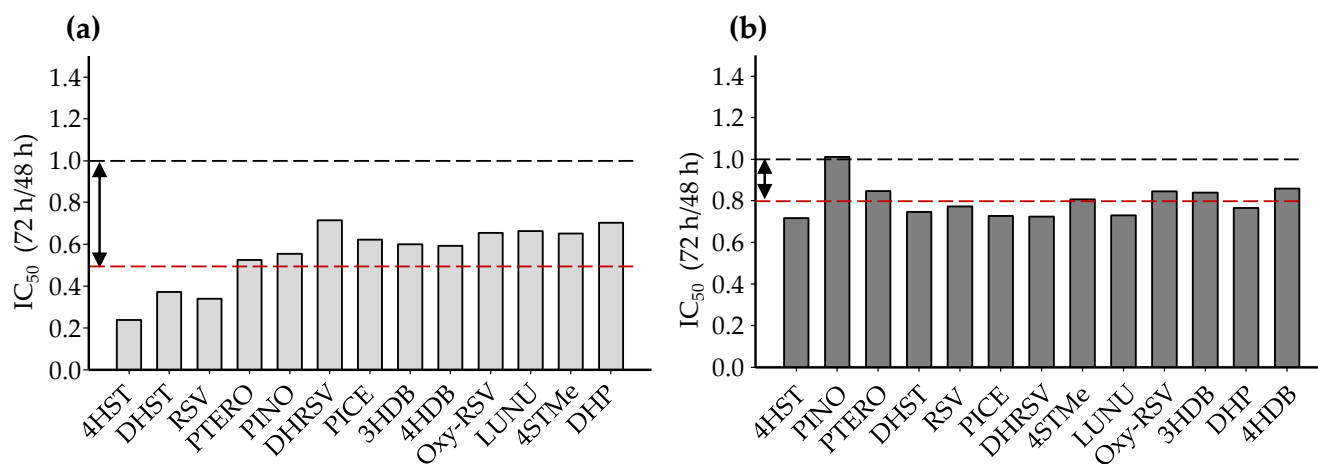

**Figure S1.** Mean decrease of IC<sub>50</sub> values from 48 to 72 h of incubation in Caco-2 **(a)** and HT-29 **(b)** cells. Black dashed lines: no change; Red dashed lines: mean IC<sub>50</sub> reduction. IC<sub>50</sub> values decreased 2-fold in Caco-2 **(a)** and 1.25-fold **(b)** in HT-29 cells.

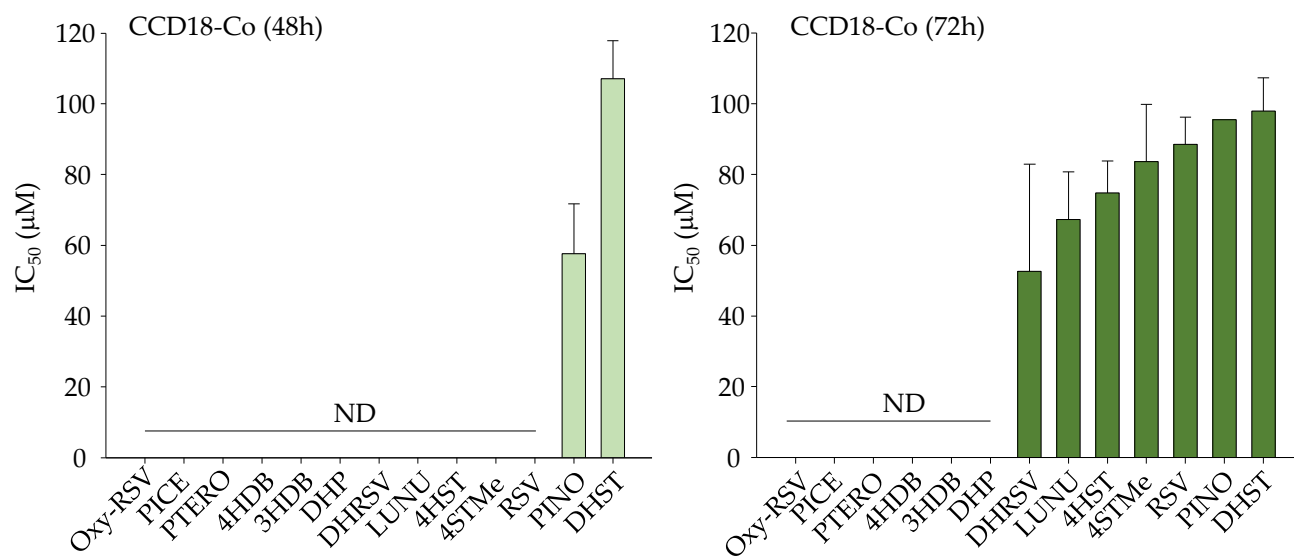

**Figure S2.** Antiproliferative IC<sub>50</sub> values of stilbenes and dibenzyls in the non-tumorigenic CCD18-Co cell line at 48 and 72 h. ND: not detected. Values are shown as mean ± SD (n=3).

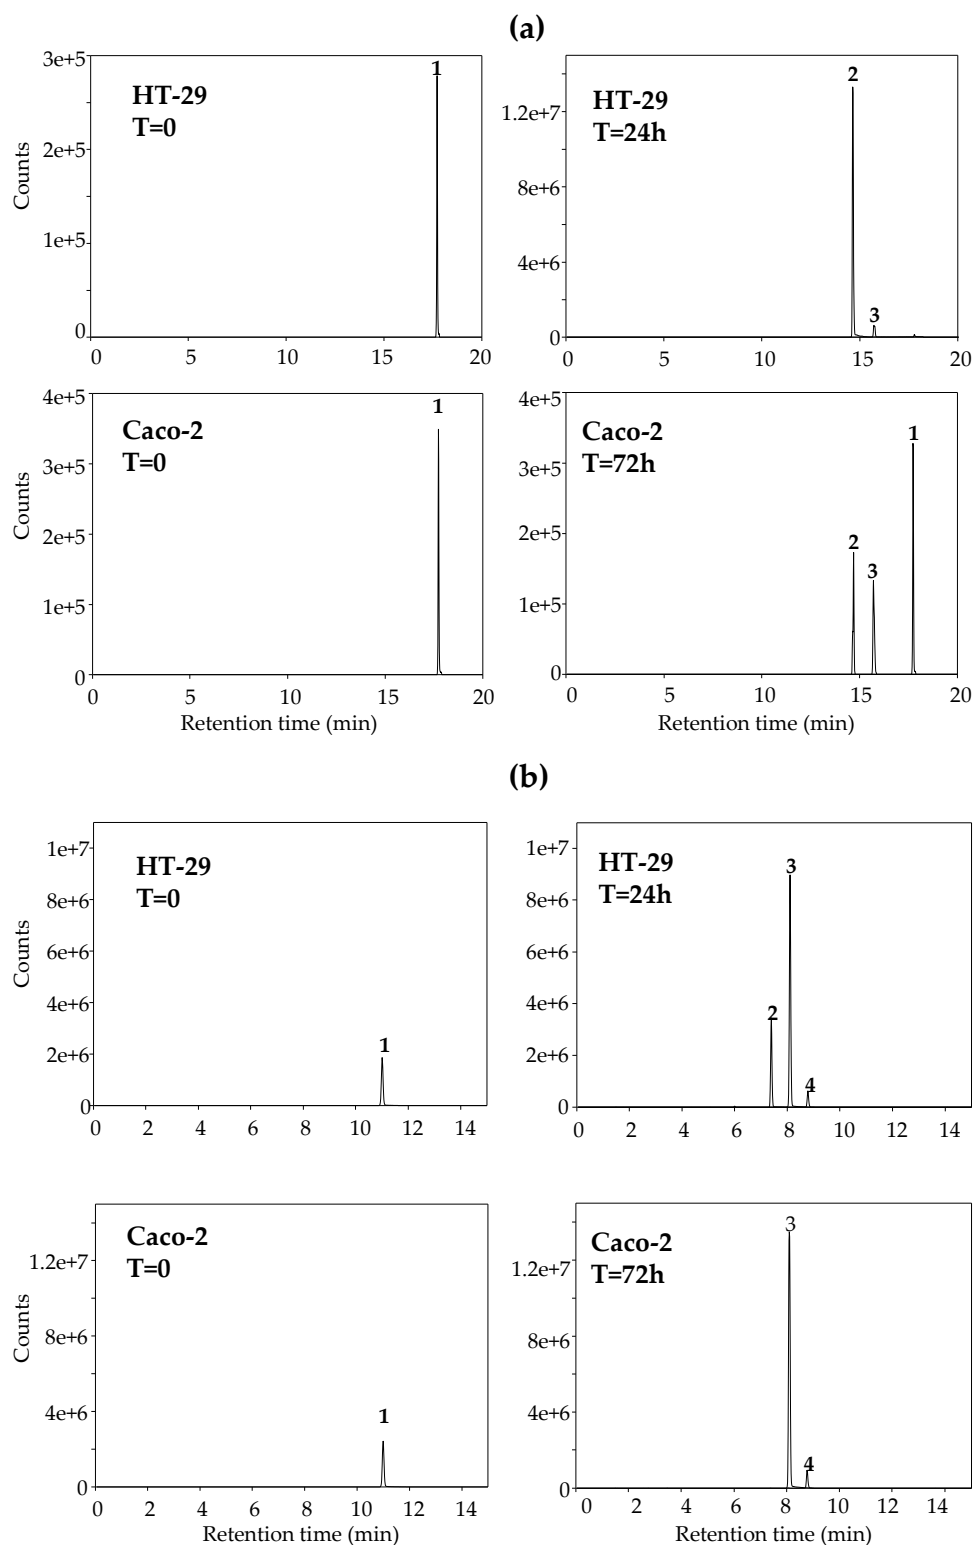

**Figure S3.** Extracted ion chromatograms showing the phase-II metabolism of pterostilbene (PTERO) **(a)** and dihydroresveratrol (DHRSV) **(b)** by HT-29 (0 and 24 h) and Caco-2 cells (0 and 72 h). **(a):** PTERO (**1**,  $m/z$  255.1027), PTERO glucuronide (**2**,  $m/z$  431.1348), and PTERO sulfate (**3**,  $m/z$  335.0595); **(b):** DHRSV (**1**,  $m/z$  229.087), DHRSV 4'-O-glucuronide (**2**,  $m/z$  405.1191), DHRSV 3-O-glucuronide (**3**,  $m/z$  405.1191), and DHRSV 3-O-sulfate (**4**,  $m/z$  309.0438).



**Figure S4. Molecular characteristics of stilbenes and dibenzyls (Chem3D Pro).**

**4-Hydroxydibenzyl (4HDB)**

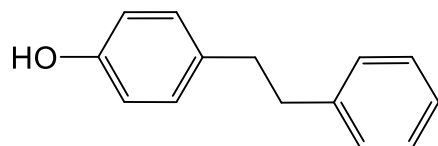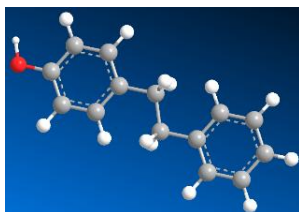

ChemPropStd: Formal Charge = 0  
ChemPropStd: Connolly Accessible Area = 414.834 Å<sup>2</sup>  
ChemPropStd: Connolly Molecular Area = 210.781 Å<sup>2</sup>  
ChemPropStd: Connolly Solvent Excluded Volume = 173.699 Å<sup>3</sup>  
ChemPropStd: Exact Mass = 198.1044650715 g/Mol  
ChemPropStd: Mass = 198.26500000145  
ChemPropStd: Mol Weight = 198.26500000145  
ChemPropStd: Number of HBond Acceptors = 1  
ChemPropStd: Number of HBond Donors = 1  
ChemPropStd: Ovality = 1.4000679822941  
ChemPropStd: Principal Moment = 200.416 2300.665 2494.471  
ChemPropStd: Elemental Analysis = C, 84.81; H, 7.12; O, 8.07  
ChemPropStd: m/z = 198.10 (100.0%), 199.11 (15.1%), 200.11 (1.1%)  
ChemPropStd: Mol Formula = C<sub>14</sub>H<sub>14</sub>O  
ChemPropStd: Mol Formula HTML = C<sub>14</sub>H<sub>14</sub>O  
CLogP Driver: Mol Refractivity = 6.28049993515015  
CLogP Driver: Partition Coefficient = 3.92100024223328  
Molecular Networks: LogP = 3.96856 Log Units  
Molecular Networks: LogS = -3.67827 Log Units  
Molecular Networks: pKa = pKa1: 9.69656 Log Units  
Molecular Topology: Balaban Index = 66628  
Molecular Topology: Cluster Count = 15  
Molecular Topology: Molecular Topological Index = 3332  
Molecular Topology: Num Rotatable Bonds = 3 Bond(s)  
Molecular Topology: Polar Surface Area = 20.23 Å<sup>2</sup>  
Molecular Topology: Radius = 5 Atom(s)  
Molecular Topology: Shape Attribute = 13.0666666666667  
Molecular Topology: Shape Coefficient = 1  
Molecular Topology: Sum Of Degrees = 32  
Molecular Topology: Sum Of Valence Degrees = 48  
Molecular Topology: Topological Diameter = 10 Bond(s)  
Molecular Topology: Total Connectivity = 0.00425258635899857  
Molecular Topology: Total Valence Connectivity = 0.000199227538385155  
Molecular Topology: Wiener Index = 420

### 3-Hydroxydibenzyl (3HDB)

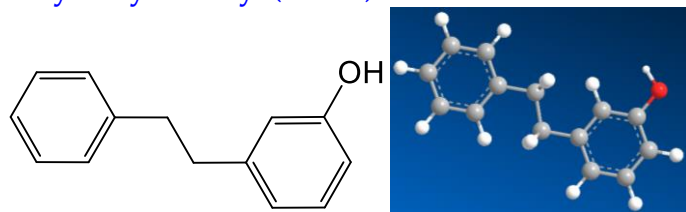

ChemPropStd: Formal Charge = 0  
ChemPropStd: Connolly Accessible Area = 414.844 Å<sup>2</sup>  
ChemPropStd: Connolly Molecular Area = 210.786 Å<sup>2</sup>  
ChemPropStd: Connolly Solvent Excluded Volume = 173.702 Å<sup>3</sup>  
ChemPropStd: Exact Mass = 198.1044650715 g/Mol  
ChemPropStd: Mass = 198.26500000145  
ChemPropStd: Mol Weight = 198.26500000145  
ChemPropStd: Number of HBond Acceptors = 1  
ChemPropStd: Number of HBond Donors = 1  
ChemPropStd: Ovality = 1.40008507295851  
ChemPropStd: Principal Moment = 284.504 2040.581 2318.474  
ChemPropStd: Elemental Analysis = C, 84.81; H, 7.12; O, 8.07  
ChemPropStd: m/z = 198.10 (100.0%), 199.11 (15.1%), 200.11 (1.1%)  
ChemPropStd: Mol Formula = C14H14O  
ChemPropStd: Mol Formula HTML = C14H14O  
CLogP Driver: Mol Refractivity = 6.28049993515015  
CLogP Driver: Partition Coefficient = 3.92100024223328  
Molecular Networks: LogP = 3.96856 Log Units  
Molecular Networks: LogS = -3.68537 Log Units  
Molecular Networks: pKa = pKa1: 9.69848 Log Units  
Molecular Topology: Balaban Index = 65403  
Molecular Topology: Cluster Count = 15  
Molecular Topology: Molecular Topological Index = 3284  
Molecular Topology: Num Rotatable Bonds = 3 Bond(s)  
Molecular Topology: Polar Surface Area = 20.23 Å<sup>2</sup>  
Molecular Topology: Radius = 5 Atom(s)  
Molecular Topology: Shape Attribute = 13.0666666666667  
Molecular Topology: Shape Coefficient = 0  
Molecular Topology: Sum Of Degrees = 32  
Molecular Topology: Sum Of Valence Degrees = 48  
Molecular Topology: Topological Diameter = 9 Bond(s)  
Molecular Topology: Total Connectivity = 0.00425258635899857  
Molecular Topology: Total Valence Connectivity = 0.000199227538385155  
Molecular Topology: Wiener Index = 412

-----

#### 4-Hydroxy-*trans*-stilbene (4HST)

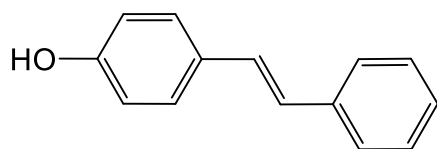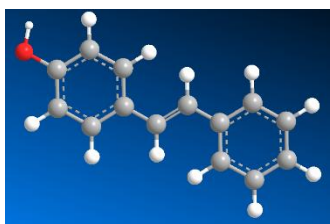

ChemPropStd: Formal Charge = 0  
ChemPropStd: Connolly Accessible Area = 400.958 Å<sup>2</sup>  
ChemPropStd: Connolly Molecular Area = 201.86 Å<sup>2</sup>  
ChemPropStd: Connolly Solvent Excluded Volume = 160.745 Å<sup>3</sup>  
ChemPropStd: Exact Mass = 196.0888150073 g/Mol  
ChemPropStd: Mass = 196.24900000135  
ChemPropStd: Mol Weight = 196.24900000135  
ChemPropStd: Number of HBond Acceptors = 1  
ChemPropStd: Number of HBond Donors = 1  
ChemPropStd: Ovality = 1.41191264934254  
ChemPropStd: Principal Moment = 192.525 2174.135 2366.661  
ChemPropStd: Elemental Analysis = C, 85.68; H, 6.16; O, 8.15  
ChemPropStd: m/z = 196.09 (100.0%), 197.09 (15.1%), 198.10 (1.1%)  
ChemPropStd: Mol Formula = C<sub>14</sub>H<sub>12</sub>O  
ChemPropStd: Mol Formula HTML = C<sub>14</sub>H<sub>12</sub>O  
CLogP Driver: Mol Refractivity = 6.40709972381592  
CLogP Driver: Partition Coefficient = 4.16699981689453  
Molecular Networks: LogP = 4.24354 Log Units  
Molecular Networks: LogS = -3.98452 Log Units  
Molecular Networks: pKa = pKa1: 9.54252 Log Units  
Molecular Topology: Balaban Index = 66628  
Molecular Topology: Cluster Count = 15  
Molecular Topology: Molecular Topological Index = 3332  
Molecular Topology: Num Rotatable Bonds = 2 Bond(s)  
Molecular Topology: Polar Surface Area = 20.23 Å<sup>2</sup>  
Molecular Topology: Radius = 5 Atom(s)  
Molecular Topology: Shape Attribute = 13.0666666666667  
Molecular Topology: Shape Coefficient = 1  
Molecular Topology: Sum Of Degrees = 32  
Molecular Topology: Sum Of Valence Degrees = 50  
Molecular Topology: Topological Diameter = 10 Bond(s)  
Molecular Topology: Total Connectivity = 0.00425258635899857  
Molecular Topology: Total Valence Connectivity = 0.000132818358923437  
Molecular Topology: Wiener Index = 420 -----

*trans*-4-Stilbenemethanol (4STMe)

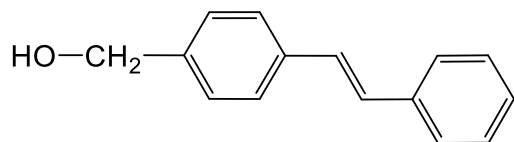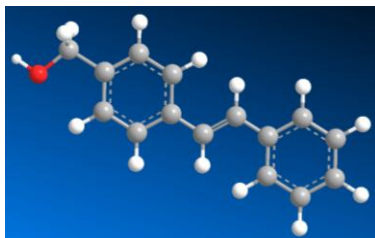

ChemPropStd: Formal Charge = 0  
ChemPropStd: Connolly Accessible Area = 432.521 Å<sup>2</sup>  
ChemPropStd: Connolly Molecular Area = 220.701 Å<sup>2</sup>  
ChemPropStd: Connolly Solvent Excluded Volume = 177.58 Å<sup>3</sup>  
ChemPropStd: Exact Mass = 210.1044650715 g/Mol  
ChemPropStd: Mass = 210.2760000015  
ChemPropStd: Mol Weight = 210.2760000015  
ChemPropStd: Number of HBond Acceptors = 1  
ChemPropStd: Number of HBond Donors = 1  
ChemPropStd: Ovality = 1.44452193855068  
ChemPropStd: Principal Moment = 202.135 2733.524 2932.353  
ChemPropStd: Elemental Analysis = C, 85.68; H, 6.71; O, 7.61  
ChemPropStd: m/z = 210.10 (100.0%), 211.11 (16.2%), 212.11 (1.2%)  
ChemPropStd: Mol Formula = C<sub>15</sub>H<sub>14</sub>O  
ChemPropStd: Mol Formula HTML = C<sub>15</sub>H<sub>14</sub>O  
CLogP Driver: Mol Refractivity = 6.87089967727661  
CLogP Driver: Partition Coefficient = 3.7960000038147  
Molecular Networks: LogP = 3.84042 Log Units  
Molecular Networks: LogS = -3.72757 Log Units  
Molecular Networks: pKa = pKa1: 14.3205 Log Units  
Molecular Topology: Balaban Index = 91948  
Molecular Topology: Cluster Count = 16  
Molecular Topology: Molecular Topological Index = 4046  
Molecular Topology: Num Rotatable Bonds = 3 Bond(s)  
Molecular Topology: Polar Surface Area = 20.23 Å<sup>2</sup>  
Molecular Topology: Radius = 6 Atom(s)  
Molecular Topology: Shape Attribute = 14.0625  
Molecular Topology: Shape Coefficient = 0  
Molecular Topology: Sum Of Degrees = 34  
Molecular Topology: Sum Of Valence Degrees = 52  
Molecular Topology: Topological Diameter = 11 Bond(s)  
Molecular Topology: Total Connectivity = 0.0030070326520293  
Molecular Topology: Total Valence Connectivity = 9.3916762260831 E-05  
Molecular Topology: Wiener Index = 512

---

### Lunularin (LUNU)

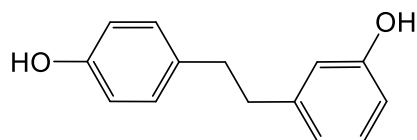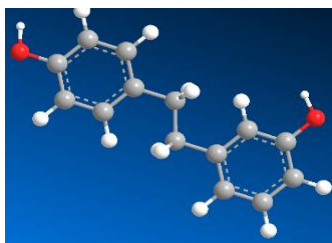

ChemPropStd: Formal Charge = 0  
ChemPropStd: Connolly Accessible Area = 426.29 Å<sup>2</sup>  
ChemPropStd: Connolly Molecular Area = 218.184 Å<sup>2</sup>  
ChemPropStd: Connolly Solvent Excluded Volume = 180.363 Å<sup>3</sup>  
ChemPropStd: Exact Mass = 214.0993796936 g/Mol  
ChemPropStd: Mass = 214.2640000015  
ChemPropStd: Mol Weight = 214.2640000015  
ChemPropStd: Number of HBond Acceptors = 2  
ChemPropStd: Number of HBond Donors = 2  
ChemPropStd: Ovality = 1.41331990239692  
ChemPropStd: Principal Moment = 285.912 2594.569 2873.871  
ChemPropStd: Elemental Analysis = C, 78.48; H, 6.59; O, 14.93  
ChemPropStd: m/z = 214.10 (100.0%), 215.10 (15.1%), 216.11 (1.1%)  
ChemPropStd: Mol Formula = C<sub>14</sub>H<sub>14</sub>O<sub>2</sub>  
ChemPropStd: Mol Formula HTML = C<sub>14</sub>H<sub>14</sub>O<sub>2</sub>  
CLogP Driver: Mol Refractivity = 6.43359994888306  
CLogP Driver: Partition Coefficient = 3.25399994850159  
Molecular Networks: LogP = 3.14367 Log Units  
Molecular Networks: LogS = -3.33896 Log Units  
Molecular Networks: pKa = pKa1: 9.78843, pKa2: 9.69251 Log Units  
Molecular Topology: Balaban Index = 89726  
Molecular Topology: Cluster Count = 16  
Molecular Topology: Molecular Topological Index = 3792  
Molecular Topology: Num Rotatable Bonds = 3 Bond(s)  
Molecular Topology: Polar Surface Area = 40.46 Å<sup>2</sup>  
Molecular Topology: Radius = 5 Atom(s)  
Molecular Topology: Shape Attribute = 14.0625  
Molecular Topology: Shape Coefficient = 1  
Molecular Topology: Sum Of Degrees = 34  
Molecular Topology: Sum Of Valence Degrees = 54  
Molecular Topology: Topological Diameter = 10 Bond(s)  
Molecular Topology: Total Connectivity = 0.0034722222222222  
Molecular Topology: Total Valence Connectivity = 7.71604938271605E-05  
Molecular Topology: Wiener Index = 499

---

### 3,4'-Dihydroxy-*trans*-stilbene (DHST)

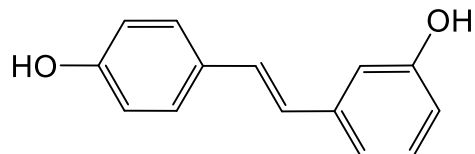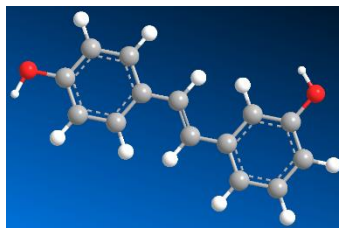

ChemPropStd: Formal Charge = 0

ChemPropStd: Connolly Accessible Area = 412.415 Å<sup>2</sup>

ChemPropStd: Connolly Molecular Area = 209.261 Å<sup>2</sup>

ChemPropStd: Connolly Solvent Excluded Volume = 167.405 Å<sup>3</sup>

ChemPropStd: Exact Mass = 212.0837296294 g/Mol

ChemPropStd: Mass = 212.2480000014

ChemPropStd: Mol Weight = 212.2480000014

ChemPropStd: Number of HBond Acceptors = 2

ChemPropStd: Number of HBond Donors = 2

ChemPropStd: Ovality = 1.42459655042544

ChemPropStd: Principal Moment = 274.919 2467.460 2742.379

ChemPropStd: Elemental Analysis = C, 79.23; H, 5.70; O, 15.08

ChemPropStd: m/z = 212.08 (100.0%), 213.09 (15.1%), 214.09 (1.1%)

ChemPropStd: Mol Formula = C<sub>14</sub>H<sub>12</sub>O<sub>2</sub>

ChemPropStd: Mol Formula HTML = C<sub>14</sub>H<sub>12</sub>O<sub>2</sub>

CLogP Driver: Mol Refractivity = 6.56019973754883

CLogP Driver: Partition Coefficient = 3.5

Molecular Networks: LogP = 3.41865 Log Units

Molecular Networks: LogS = -3.64489 Log Units

Molecular Networks: pKa = pKa1: 9.29009, pKa2: 9.51862 Log Units

Molecular Topology: Balaban Index = 89726

Molecular Topology: Cluster Count = 16

Molecular Topology: Molecular Topological Index = 3792

Molecular Topology: Num Rotatable Bonds = 2 Bond(s)

Molecular Topology: Polar Surface Area = 40.46 Å<sup>2</sup>

Molecular Topology: Radius = 5 Atom(s)

Molecular Topology: Shape Attribute = 14.0625

Molecular Topology: Shape Coefficient = 1

Molecular Topology: Sum Of Degrees = 34

Molecular Topology: Sum Of Valence Degrees = 56

Molecular Topology: Topological Diameter = 10 Bond(s)

Molecular Topology: Total Connectivity = 0.0034722222222222

Molecular Topology: Total Valence Connectivity = 5.1440329218107 E-05

Molecular Topology: Wiener Index = 499



### Dihydropinosylvin (DHP)

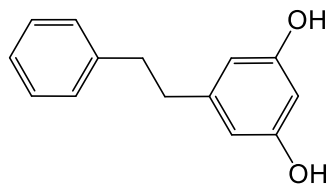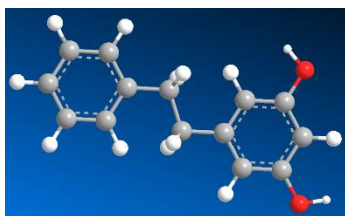

ChemPropStd: Formal Charge = 0  
ChemPropStd: Connolly Accessible Area = 426.286 Å<sup>2</sup>  
ChemPropStd: Connolly Molecular Area = 218.182 Å<sup>2</sup>  
ChemPropStd: Connolly Solvent Excluded Volume = 180.356 Å<sup>3</sup>  
ChemPropStd: Exact Mass = 214.0993796936 g/Mol  
ChemPropStd: Mass = 214.2640000015  
ChemPropStd: Mol Weight = 214.2640000015  
ChemPropStd: Number of HBond Acceptors = 2  
ChemPropStd: Number of HBond Donors = 2  
ChemPropStd: Ovality = 1.41334351582341  
ChemPropStd: Principal Moment = 363.882 2359.513 2716.785  
ChemPropStd: Elemental Analysis = C, 78.48; H, 6.59; O, 14.93  
ChemPropStd: m/z = 214.10 (100.0%), 215.10 (15.1%), 216.11 (1.1%)  
ChemPropStd: Mol Formula = C<sub>14</sub>H<sub>14</sub>O<sub>2</sub>  
ChemPropStd: Mol Formula HTML = C<sub>14</sub>H<sub>14</sub>O<sub>2</sub>  
CLogP Driver: Mol Refractivity = 6.43359994888306  
CLogP Driver: Partition Coefficient = 3.25399994850159  
Molecular Networks: LogP = 3.55958 Log Units  
Molecular Networks: LogS = -3.63411 Log Units  
Molecular Networks: pKa = pKa1: 9.54456, pKa2: 9.54456 Log Units  
Molecular Topology: Balaban Index = 87246  
Molecular Topology: Cluster Count = 16  
Molecular Topology: Molecular Topological Index = 3720  
Molecular Topology: Num Rotatable Bonds = 3 Bond(s)  
Molecular Topology: Polar Surface Area = 40.46 Å<sup>2</sup>  
Molecular Topology: Radius = 5 Atom(s)  
Molecular Topology: Shape Attribute = 14.0625  
Molecular Topology: Shape Coefficient = 0  
Molecular Topology: Sum Of Degrees = 34  
Molecular Topology: Sum Of Valence Degrees = 54  
Molecular Topology: Topological Diameter = 9 Bond(s)  
Molecular Topology: Total Connectivity = 0.0034722222222222  
Molecular Topology: Total Valence Connectivity = 7.71604938271605 E-05  
Molecular Topology: Wiener Index = 485

-----

### Pinosylvin (PINO)

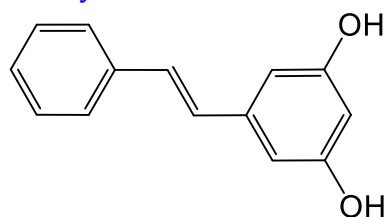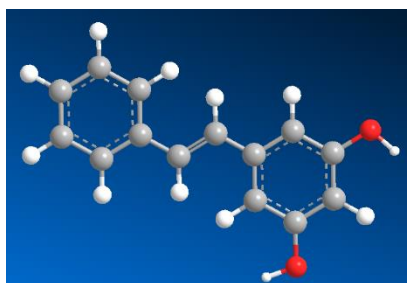

ChemPropStd: Formal Charge = 0  
ChemPropStd: Connolly Accessible Area = 412.427 Å<sup>2</sup>  
ChemPropStd: Connolly Molecular Area = 209.267 Å<sup>2</sup>  
ChemPropStd: Connolly Solvent Excluded Volume = 167.411 Å<sup>3</sup>  
ChemPropStd: Exact Mass = 212.0837296294 g/Mol  
ChemPropStd: Mass = 212.2480000014  
ChemPropStd: Mol Weight = 212.2480000014  
ChemPropStd: Number of HBond Acceptors = 2  
ChemPropStd: Number of HBond Donors = 2  
ChemPropStd: Ovality = 1.42460335744336  
ChemPropStd: Principal Moment = 357.720 2225.664 2583.384  
ChemPropStd: Elemental Analysis = C, 79.23; H, 5.70; O, 15.08  
ChemPropStd: m/z = 212.08 (100.0%), 213.09 (15.1%), 214.09 (1.1%)  
ChemPropStd: Mol Formula = C<sub>14</sub>H<sub>12</sub>O<sub>2</sub>  
ChemPropStd: Mol Formula HTML = C<sub>14</sub>H<sub>12</sub>O<sub>2</sub>  
CLogP Driver: Mol Refractivity = 6.56019973754883  
CLogP Driver: Partition Coefficient = 3.5  
Molecular Networks: LogP = 3.83456 Log Units  
Molecular Networks: LogS = -3.93028 Log Units  
Molecular Networks: pKa = pKa1: 9.05838, pKa2: 9.05838 Log Units  
Molecular Topology: Balaban Index = 87246  
Molecular Topology: Cluster Count = 16  
Molecular Topology: Molecular Topological Index = 3720  
Molecular Topology: Num Rotatable Bonds = 2 Bond(s)  
Molecular Topology: Polar Surface Area = 40.46 Å<sup>2</sup>  
Molecular Topology: Radius = 5 Atom(s)  
Molecular Topology: Shape Attribute = 14.0625  
Molecular Topology: Shape Coefficient = 0  
Molecular Topology: Sum Of Degrees = 34  
Molecular Topology: Sum Of Valence Degrees = 56  
Molecular Topology: Topological Diameter = 9 Bond(s)  
Molecular Topology: Total Connectivity = 0.0034722222222222  
Molecular Topology: Total Valence Connectivity = 5.1440329218107 E-05  
Molecular Topology: Wiener Index = 485

-----



*trans*-Resveratrol (RSV)

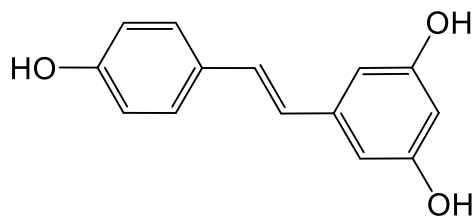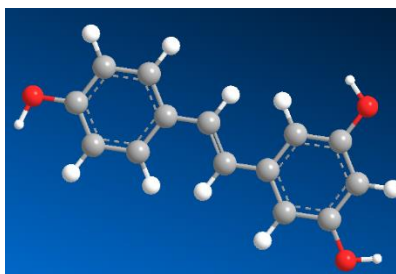

ChemPropStd: Formal Charge = 0  
ChemPropStd: Connolly Accessible Area = 423.868 Å<sup>2</sup>  
ChemPropStd: Connolly Molecular Area = 216.66 Å<sup>2</sup>  
ChemPropStd: Connolly Solvent Excluded Volume = 174.062 Å<sup>3</sup>  
ChemPropStd: Exact Mass = 228.0786442515 g/Mol  
ChemPropStd: Mass = 228.24700000145  
ChemPropStd: Mol Weight = 228.24700000145  
ChemPropStd: Number of HBond Acceptors = 3  
ChemPropStd: Number of HBond Donors = 3  
ChemPropStd: Ovality = 1.43711647490366  
ChemPropStd: Principal Moment = 362.982 2815.846 3178.829  
ChemPropStd: Elemental Analysis = C, 73.67; H, 5.30; O, 21.03  
ChemPropStd: m/z = 228.08 (100.0%), 229.08 (15.1%), 230.09 (1.1%)  
ChemPropStd: Mol Formula = C<sub>14</sub>H<sub>12</sub>O<sub>3</sub>  
ChemPropStd: Mol Formula HTML = C<sub>14</sub>H<sub>12</sub>O<sub>3</sub>  
CLogP Driver: Mol Refractivity = 6.71329975128174  
CLogP Driver: Partition Coefficient = 2.83299994468689  
Molecular Networks: LogP = 2.59376 Log Units  
Molecular Networks: LogS = -3.29862 Log Units  
Molecular Networks: pKa = pKa1: 9.1338, pKa2: 9.50554, pKa3:9.50554 Log Units  
Molecular Topology: Balaban Index = 117735  
Molecular Topology: Cluster Count = 17  
Molecular Topology: Molecular Topological Index = 4268  
Molecular Topology: Num Rotatable Bonds = 2 Bond(s)  
Molecular Topology: Polar Surface Area = 60.69 Å<sup>2</sup>  
Molecular Topology: Radius = 5 Atom(s)  
Molecular Topology: Shape Attribute = 15.0588235294118  
Molecular Topology: Shape Coefficient = 1  
Molecular Topology: Sum Of Degrees = 36  
Molecular Topology: Sum Of Valence Degrees = 62  
Molecular Topology: Topological Diameter = 10 Bond(s)  
Molecular Topology: Total Connectivity = 0.00283505757266572  
Molecular Topology: Total Valence Connectivity = 1.99227538385155 E-05  
Molecular Topology: Wiener Index = 582

### Dihydroresveratrol (DHRSV)

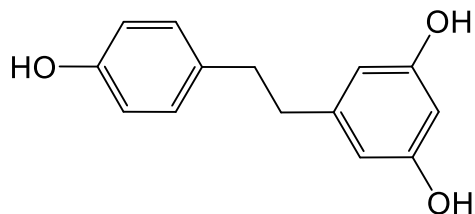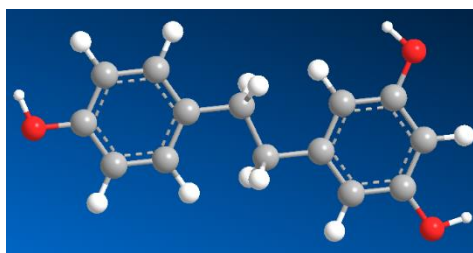

ChemPropStd: Formal Charge = 0  
ChemPropStd: Connolly Accessible Area = 437.763 Å<sup>2</sup>  
ChemPropStd: Connolly Molecular Area = 225.595 Å<sup>2</sup>  
ChemPropStd: Connolly Solvent Excluded Volume = 187.027 Å<sup>3</sup>  
ChemPropStd: Exact Mass = 230.0942943157 g/Mol  
ChemPropStd: Mass = 230.26300000155  
ChemPropStd: Mol Weight = 230.26300000155  
ChemPropStd: Number of HBond Acceptors = 3  
ChemPropStd: Number of HBond Donors = 3  
ChemPropStd: Ovality = 1.42640375564467  
ChemPropStd: Principal Moment = 368.843 2971.769 3334.002  
ChemPropStd: Elemental Analysis = C, 73.03; H, 6.13; O, 20.84  
ChemPropStd: m/z = 230.09 (100.0%), 231.10 (15.1%), 232.10 (1.1%)  
ChemPropStd: Mol Formula = C<sub>14</sub>H<sub>14</sub>O<sub>3</sub>  
ChemPropStd: Mol Formula HTML = C<sub>14</sub>H<sub>14</sub>O<sub>3</sub>  
CLogP Driver: Mol Refractivity = 6.58669996261597  
CLogP Driver: Partition Coefficient = 2.58699989318848  
Molecular Networks: LogP = 2.31877 Log Units  
Molecular Networks: LogS = -2.9915 Log Units  
Molecular Networks: pKa = pKa1: 9.54972, pKa2: 9.68852, pKa3: 9.68852 Log Units  
Molecular Topology: Balaban Index = 117735  
Molecular Topology: Cluster Count = 17  
Molecular Topology: Molecular Topological Index = 4268  
Molecular Topology: Num Rotatable Bonds = 3 Bond(s)  
Molecular Topology: Polar Surface Area = 60.69 Å<sup>2</sup>  
Molecular Topology: Radius = 5 Atom(s)  
Molecular Topology: Shape Attribute = 15.0588235294118  
Molecular Topology: Shape Coefficient = 1  
Molecular Topology: Sum Of Degrees = 36  
Molecular Topology: Sum Of Valence Degrees = 60  
Molecular Topology: Topological Diameter = 10 Bond(s)  
Molecular Topology: Total Connectivity = 0.00283505757266572  
Molecular Topology: Total Valence Connectivity = 2.98841307577733 E-05  
Molecular Topology: Wiener Index = 582

---

## Piceatannol (PICE)

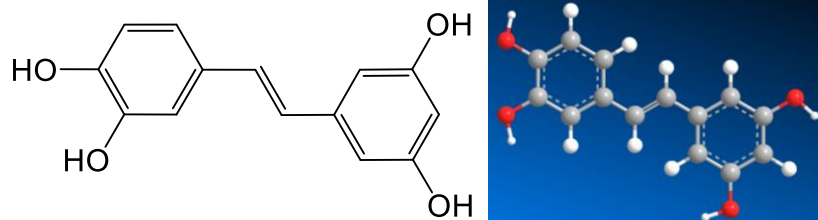

ChemPropStd: Formal Charge = 0

ChemPropStd: Connolly Accessible Area = 434.802 Å<sup>2</sup>

ChemPropStd: Connolly Molecular Area = 223.926 Å<sup>2</sup>

ChemPropStd: Connolly Solvent Excluded Volume = 180.704 Å<sup>3</sup>

ChemPropStd: Exact Mass = 244.0735588736 g/Mol

ChemPropStd: Mass = 244.2460000015

ChemPropStd: Mol Weight = 244.2460000015

ChemPropStd: Number of HBond Acceptors = 4

ChemPropStd: Number of HBond Donors = 4

ChemPropStd: Ovality = 1.4486891934211

ChemPropStd: Principal Moment = 425.765 3184.629 3610.393

ChemPropStd: Elemental Analysis = C, 68.85; H, 4.95; O, 26.20

ChemPropStd: m/z = 244.07 (100.0%), 245.08 (15.1%), 246.08 (1.1%)

ChemPropStd: Mol Formula = C<sub>14</sub>H<sub>12</sub>O<sub>4</sub>

ChemPropStd: Mol Formula HTML = C<sub>14</sub>H<sub>12</sub>O<sub>4</sub>

CLogP Driver: Mol Refractivity = 6.86639976501465

CLogP Driver: Partition Coefficient = 2.23600006103516

Molecular Networks: LogP = 1.7855 Log Units

Molecular Networks: LogS = -2.9088 Log Units

Molecular Networks: pKa = pKa1: 8.60035, pKa2: 9.18246, pKa3: 9.18246, pKa4: 14.8832 Log Units

Molecular Topology: Balaban Index = 152012

Molecular Topology: Cluster Count = 18

Molecular Topology: Molecular Topological Index = 4772

Molecular Topology: Num Rotatable Bonds = 2 Bond(s)

Molecular Topology: Polar Surface Area = 80.92 Å<sup>2</sup>

Molecular Topology: Radius = 5 Atom(s)

Molecular Topology: Shape Attribute = 16.05555555555556

Molecular Topology: Shape Coefficient = 1

Molecular Topology: Sum Of Degrees = 38

Molecular Topology: Sum Of Valence Degrees = 68

Molecular Topology: Topological Diameter = 10 Bond(s)

Molecular Topology: Total Connectivity = 0.00231481481481481

Molecular Topology: Total Valence Connectivity = 7.71604938271605 E-06

Molecular Topology: Wiener Index = 672

**Oxyresveratrol (Oxy-RSV)**

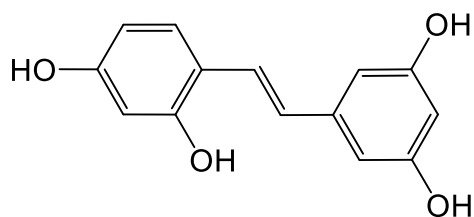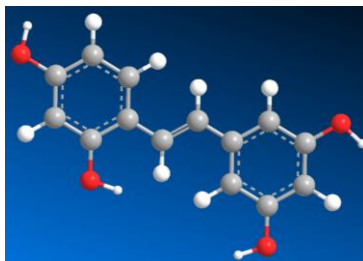

ChemPropStd: Formal Charge = 0  
ChemPropStd: Connolly Accessible Area = 429.541 Å<sup>2</sup>  
ChemPropStd: Connolly Molecular Area = 221.59 Å<sup>2</sup>  
ChemPropStd: Connolly Solvent Excluded Volume = 179.48 Å<sup>3</sup>  
ChemPropStd: Exact Mass = 244.0735588736 g/Mol  
ChemPropStd: Mass = 244.2460000015  
ChemPropStd: Mol Weight = 244.2460000015  
ChemPropStd: Number of HBond Acceptors = 4  
ChemPropStd: Number of HBond Donors = 4  
ChemPropStd: Ovality = 1.44008676511875  
ChemPropStd: Principal Moment = 459.116 2893.857 3352.973  
ChemPropStd: Elemental Analysis = C, 68.85; H, 4.95; O, 26.20  
ChemPropStd: m/z = 244.07 (100.0%), 245.08 (15.1%), 246.08 (1.1%)  
ChemPropStd: Mol Formula = C<sub>14</sub>H<sub>12</sub>O<sub>4</sub>  
ChemPropStd: Mol Formula HTML = C<sub>14</sub>H<sub>12</sub>O<sub>4</sub>  
CLogP Driver: Mol Refractivity = 6.86639976501465  
CLogP Driver: Partition Coefficient = 2.16600012779236  
Molecular Networks: LogP = 1.13957 Log Units  
Molecular Networks: LogS = -2.50538 Log Units  
Molecular Networks: pKa = pKa1:8.73176, pKa2: 9.95855, pKa3: 9.95855, pKa4: 12.9427 Log Units  
Molecular Topology: Balaban Index = 149955  
Molecular Topology: Cluster Count = 18  
Molecular Topology: Molecular Topological Index = 4720  
Molecular Topology: Num Rotatable Bonds = 2 Bond(s)  
Molecular Topology: Polar Surface Area = 80.92 Å<sup>2</sup>  
Molecular Topology: Radius = 5 Atom(s)  
Molecular Topology: Shape Attribute = 16.0555555555556  
Molecular Topology: Shape Coefficient = 1  
Molecular Topology: Sum Of Degrees = 38  
Molecular Topology: Sum Of Valence Degrees = 68  
Molecular Topology: Topological Diameter = 10 Bond(s)  
Molecular Topology: Total Connectivity = 0.00231481481481481  
Molecular Topology: Total Valence Connectivity = 7.71604938271605 E-06  
Molecular Topology: Wiener Index = 663

*trans*-Pterostilbene (PTERO)

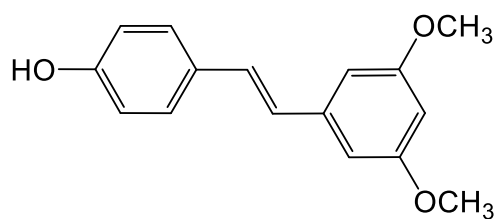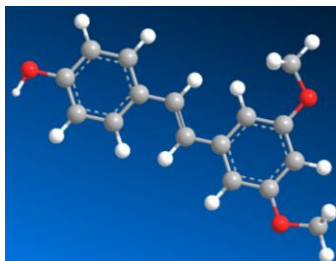

ChemPropStd: Formal Charge = 0  
ChemPropStd: Connolly Accessible Area = 480.648 Å<sup>2</sup>  
ChemPropStd: Connolly Molecular Area = 249.942 Å<sup>2</sup>  
ChemPropStd: Connolly Solvent Excluded Volume = 204.911 Å<sup>3</sup>  
ChemPropStd: Exact Mass = 256.1099443799 g/Mol  
ChemPropStd: Mass = 256.30100000175  
ChemPropStd: Mol Weight = 256.30100000175  
ChemPropStd: Number of HBond Acceptors = 3  
ChemPropStd: Number of HBond Donors = 1  
ChemPropStd: Ovality = 1.48700216559027  
ChemPropStd: Principal Moment = 579.501 3384.993 3957.884  
ChemPropStd: Elemental Analysis = C, 74.98; H, 6.29; O, 18.73  
ChemPropStd: m/z = 256.11 (100.0%), 257.11 (17.3%), 258.12 (1.4%)  
ChemPropStd: Mol Formula = C<sub>16</sub>H<sub>16</sub>O<sub>3</sub>  
ChemPropStd: Mol Formula HTML = C<sub>16</sub>H<sub>16</sub>O<sub>3</sub>  
CLogP Driver: Mol Refractivity = 7.64089965820313  
CLogP Driver: Partition Coefficient = 4.17500019073486  
Molecular Networks: LogP = 4.04849 Log Units  
Molecular Networks: LogS = -4.13642 Log Units  
Molecular Networks: pKa = pKa1: 9.50818 Log Units  
Molecular Topology: Balaban Index = 197745  
Molecular Topology: Cluster Count = 19  
Molecular Topology: Molecular Topological Index = 5860  
Molecular Topology: Num Rotatable Bonds = 4 Bond(s)  
Molecular Topology: Polar Surface Area = 38.69 Å<sup>2</sup>  
Molecular Topology: Radius = 6 Atom(s)  
Molecular Topology: Shape Attribute = 17.0526315789474  
Molecular Topology: Shape Coefficient = 0  
Molecular Topology: Sum Of Degrees = 40  
Molecular Topology: Sum Of Valence Degrees = 66  
Molecular Topology: Topological Diameter = 11 Bond(s)  
Molecular Topology: Total Connectivity = 0.00141752878633286  
Molecular Topology: Total Valence Connectivity = 1.66022948654296 E-05  
Molecular Topology: Wiener Index = 788

---



## Rotated component matrix

|                     | Components |       |       |
|---------------------|------------|-------|-------|
|                     | 1          | 2     | 3     |
| Caco 2_IC50 72h     | .110       | .119  | .808  |
| Caco 2_IC50 48 h    | -.129      | -.094 | .854  |
| Conn. Acc. Area     | .959       | -.043 | .257  |
| Conn. Mol. Area     | .955       | .012  | .273  |
| Conn. Sol. Ex. Vol. | .873       | -.028 | .454  |
| Exact Mass          | .888       | .454  | -.009 |
| Mass                | .888       | .454  | -.009 |
| Mol. Weight         | .888       | .454  | -.009 |
| HBond Acceptors     | .641       | .761  | -.070 |
| Ovality             | .956       | .123  | -.240 |
| pKa1                | -.244      | -.779 | .420  |
| Mol. Refractivity   | .974       | .031  | -.158 |
| Partition Coeff.    | -.101      | -.978 | -.066 |
| LogP                | -.187      | -.962 | -.091 |
| LogS                | -.005      | .937  | .263  |
| Balaban Index       | .936       | .299  | -.120 |
| Mol. Topol. Index   | .960       | .223  | -.122 |
| Polar Surface Area  | .367       | .887  | -.189 |
| Shape Attribute     | .893       | .407  | -.139 |
| Sum Of Valence Deg. | .743       | .618  | -.240 |
| Total Connectivity  | -.911      | -.359 | .143  |
| Total Valence Conn. | -.633      | -.571 | .391  |
| Wiener Index        | .930       | .343  | -.041 |

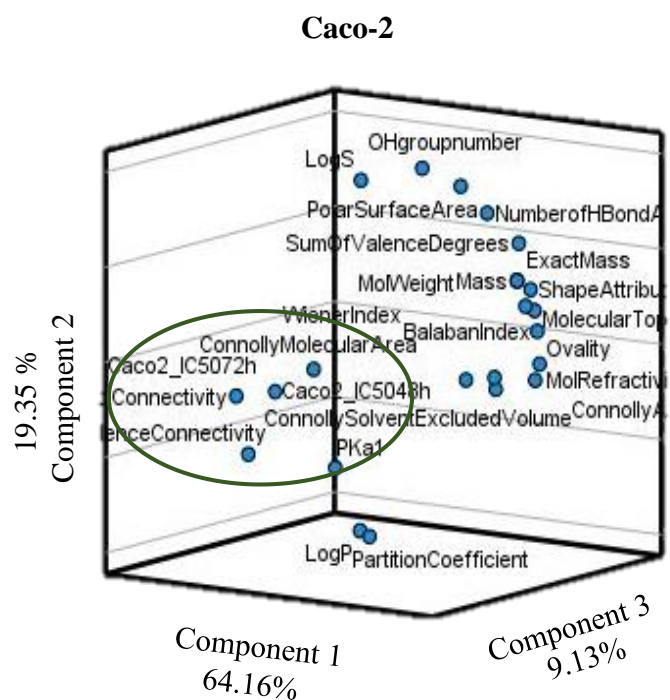

■ Significant variables in component 3 (when  $\geq +0.5$ )

**Figure S5.** Principal component analysis in 3-dimensional rotated space for Caco-2 cells. Variables close to significance (0.5) are shown in the rotated component matrix (component 3).
